# Supplementary material for: Bacteriophage St_134 and its Endolysin as a Potential Staphy-lococcus Biofilm-Removing Biological Agent
Source: Preprints.org preprint supplement (doi:10.20944/preprints202312.1650.v1), 2023-12-21
Supplement: Supplementary file 1 [file Figure S1.docx]

| **A** |  | **B** |  |
| --- | --- | --- | --- |
| **116**  **66**  **45**  **35**  **25**  **18** | **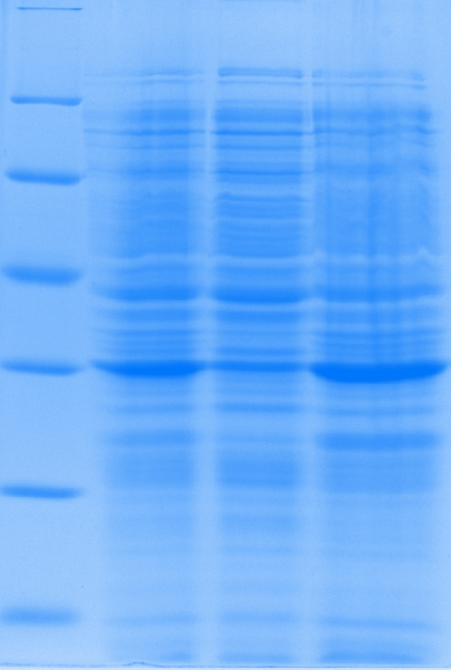** | **116**  **66**  **45**  **35**  **25**  **18** | **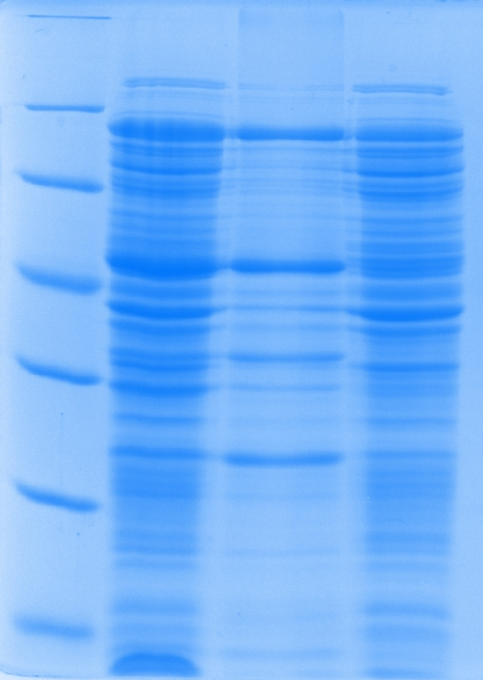** |

**Figure S1.** Figure S1: SDS PAAG electrophoreses (A): 1 - lysates of E. coli M15-pQE-60/LysSte134_1 cells, producing recombinant LysSte134_1; 2 – insoluble cytoplasm of E. coli M15- pQE-60/LysSte134_1; 3 –soluble cytoplasm of E. coli M15- pQE-60/LysSte134_1. (B): 1 - lysates of E. coli M15-pQE-60/LysSte134_2 cells, producing recombinant LysSte134_2; 2 – insoluble cytoplasm of E. coli M15- pQE-60/LysSte134_2; 3 – soluble cytoplasm of E. coli M15- pQE-60/LysSte134_2. M- protein ladder 26610 Pierce ™ Unstained protein (Thermo Fisher Scientific, Waltham, MA, USA).
